# Supplementary material for: One-pot redox synthesis of Pt/Fe3O4 catalyst for efficiently chemoselective hydrogenation of cinnamaldehyde
Source: Royal Society of Chemistry journal article supplement (doi:10.1039/c7ra02898a), 2017-01-01
Supplement: c7ra02898a1.pdf [file c7ra02898a1.pdf]

## Electronic Supplementary Information

### One-pot redox synthesis of Pt/Fe<sub>3</sub>O<sub>4</sub> catalyst for efficiently chemoselective hydrogenation of cinnamaldehyde

Yong Zhang,<sup>a,b</sup> Chun Chen,<sup>\*a</sup> Wanbing Gong,<sup>a,b</sup> Jieyao Song,<sup>a,b</sup> Yanping Su,<sup>a,b</sup> Haimin Zhang,<sup>a</sup> Guozhong Wang<sup>a</sup> and Huijun Zhao<sup>\*a,c</sup>

<sup>a</sup> Key Laboratory of Materials Physics, Centre for Environmental and Energy Nanomaterials, Anhui Key Laboratory of Nanomaterials and Nanotechnology, CAS Center for Excellence in Nanoscience, Institute of Solid State Physics, Chinese Academy of Sciences, Hefei 230031, China. E-mail: h.zhao@griffith.edu.au; chenchun2013@issp.ac.cn

<sup>b</sup> University of Science and Technology of China, Hefei, Anhui 230026, China

<sup>c</sup> Centre for Clean Environment and Energy, Griffith University, Gold Coast Campus, Queensland 4222, Australia

**Tables****Table S1** The binding energy and fraction of Pt species for Pt/Fe<sub>3</sub>O<sub>4</sub>(100) catalyst

| Sample | Pt <sup>0</sup> binding energy (eV) |                   | Pt <sup>2+</sup> binding energy (eV) |                   | Pt <sup>2+</sup> fraction (%) |
|--------|-------------------------------------|-------------------|--------------------------------------|-------------------|-------------------------------|
|        | 4f <sub>7/2</sub>                   | 4f <sub>5/2</sub> | 4f <sub>7/2</sub>                    | 4f <sub>5/2</sub> |                               |
| fresh  | 71.3                                | 74.6              | 72.2                                 | 75.3              | 28.5                          |
| used   | 71.3                                | 74.6              | 72.1                                 | 75.4              | 33.7                          |

**Table S2** Previous literatures for the chemoselective hydrogenation of CAL to COL over Pt-based supported catalysts

| Entry | Catalysts                                    | Reaction conditions                  | Conv. (%) | Sel. (%) | Refs.      |
|-------|----------------------------------------------|--------------------------------------|-----------|----------|------------|
| 1     | Pt/CeO <sub>2</sub> -ZrO <sub>2</sub> +NaOH  | RT, 20 bar H <sub>2</sub> , 2 h      | 42.3      | 97.3     | 1          |
| 2     | Pt@UiO-66-NH <sub>2</sub>                    | 298 K, 40 bar H <sub>2</sub> , 42 h  | 85.9      | 87.9     | 2          |
| 3     | Pt/MesoTiO <sub>2</sub> -SiO <sub>2</sub> -M | 353 K, 40 bar H <sub>2</sub> , 0.5 h | 98.8      | 90.9     | 3          |
| 4     | MIL-101(Cr)@Pt@MIL-101(Fe) <sup>2,9</sup>    | RT, 30 bar H <sub>2</sub> , 20 h     | 99.8      | 95.6     | 4          |
| 5     | Pt/MIL-100@MIL-100                           | 298 K, 1.01 bar H <sub>2</sub> , 4 h | 95.0      | 96.0     | 5          |
| 6     | Pt/ZnFe-LDH                                  | 333 K, 20 bar H <sub>2</sub> , 2 h   | 95.1      | 91.0     | 6          |
| 7     | PtCo/N-CNT                                   | 343 K, 20 bar H <sub>2</sub> , 1.5 h | 99.7      | 87.9     | 7          |
| 8     | Pt/CoAl-LDH                                  | 343 K, 20 bar H <sub>2</sub> , 2 h   | 94.3      | 74.2     | 8          |
| 9     | Co-Pt/SiO <sub>2</sub>                       | 353 K, 40 bar H <sub>2</sub> , 2 h   | 28.6      | 78.0     | 9          |
| 10    | Pt/Fe <sub>3</sub> O <sub>4</sub> (100)      | 303 K, 5 bar H <sub>2</sub> , 2.5 h  | 94.2      | 92.2     | This study |

## References

- 1 S. Bhogeswararao and D. Srinivas, *J. Catal.*, 2012, **285**, 31-40.
- 2 Z. Guo, C. Xiao, R. V. Maligal-Ganesh, L. Zhou, T. W. Goh, X. Li, D. Tesfagaber, A. Thiel and W. Huang, *ACS Catal.*, 2014, **4**, 1340-1348.
- 3 Q. Wu, C. Zhang, B. Zhang, X. Li, Z. Ying, T. Liu, W. Lin, Y. Yu, H. Cheng and F. Zhao, *J. Colloid. Interface. Sci.*, 2016, **463**, 75-82.
- 4 M. Zhao, K. Yuan, Y. Wang, G. Li, J. Guo, L. Gu, W. Hu, H. Zhao and Z. Tang, *Nature.*, 2016, **539**, 76-80.
- 5 H. Liu, L. Chang, L. Chen and Y. Li, *ChemCatChem.*, 2016, **8**, 946-951.
- 6 Z. Tian, Q. Li, J. Hou, Y. Li and S. Ai, *Catal. Sci. Technol.*, 2016, **6**, 703-707.
- 7 Z. Tian, C. Liu, Q. Li, J. Hou, Y. Li and S. Ai, *Appl. Catal., A Gen.*, 2015, **506**, 134-142.
- 8 Z. Tian, Q. Li, J. Hou, L. Pei, Y. Li and S. Ai, *J. Catal.*, 2015, **331**, 193-202.
- 9 R. Zheng, M. D. Porosoff, J. L. Weiner, S. Lu, Y. Zhu and J. G. Chen, *Appl. Catal., A Gen.*, 2012, **419-420**, 126-132.

**Table S3** Effect of concentration of substrate on catalytic performance over Pt/Fe<sub>3</sub>O<sub>4</sub>(100) catalyst. Reaction conditions: 303 K, 5 bar H<sub>2</sub>, 120 min, 5 ml 2-propanol used as solvent

| Entry | CAL concentration (mol L <sup>-1</sup> ) | CAL conv. (%) | COL sel. (%) | HCAL sel. (%) | HCOL sel. (%) |
|-------|------------------------------------------|---------------|--------------|---------------|---------------|
| 1     | 0.032                                    | 94.2          | 92.9         | 3.9           | 3.2           |
| 2     | 0.079                                    | 66.2          | 92.5         | 3.2           | 4.3           |
| 3     | 0.16                                     | 47.8          | 92.3         | 3.7           | 4.0           |
| 4     | 0.32                                     | 25.9          | 90.6         | 4.3           | 5.1           |
| 5     | 0.79                                     | 23.5          | 92.4         | 4.2           | 3.4           |

**Table S4** Effect of stirring speed on catalytic performance over Pt/Fe<sub>3</sub>O<sub>4</sub>(100) catalyst. Reaction conditions: 303 K, 5 bar H<sub>2</sub>, 10 min, 5 ml 2-propanol used as solvent

| Entry | Stirring speed (rpm) | CAL conv. (%) | COL sel. (%) | HCAL sel. (%) | HCOL sel. (%) |
|-------|----------------------|---------------|--------------|---------------|---------------|
| 1     | 200                  | 15.6          | 87.4         | 12.6          | 5.4           |
| 2     | 530                  | 37.9          | 92.4         | 4.4           | 3.2           |
| 3     | 750                  | 36.1          | 93.1         | 3.4           | 3.5           |
| 4     | 1000                 | 35.9          | 92.3         | 4.0           | 3.7           |

Figures

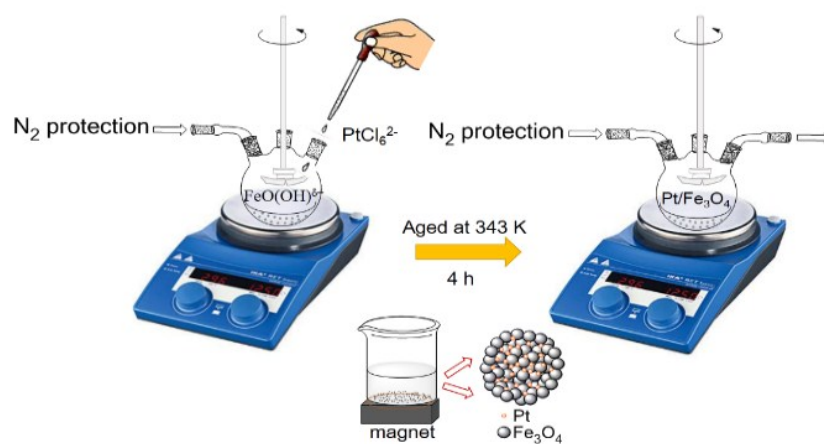

Fig. S1 Synthesis procedure of Pt/Fe<sub>3</sub>O<sub>4</sub> catalysts with a facile redox reaction.

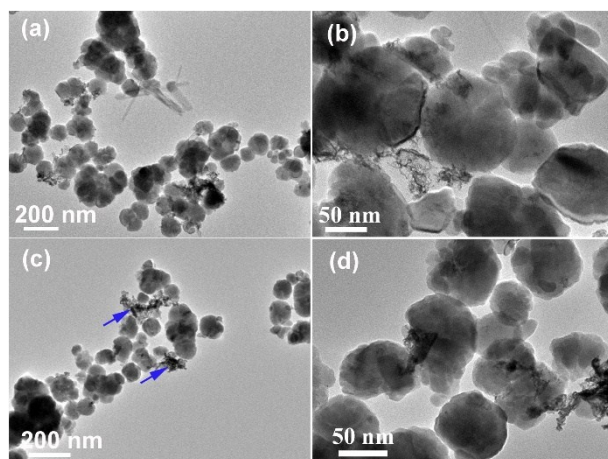

**Fig. S2** TEM and HRTEM images: (a-b) Pt/Fe<sub>3</sub>O<sub>4</sub>(200) catalyst; (c-d) Pt/Fe<sub>3</sub>O<sub>4</sub>(50) catalyst.

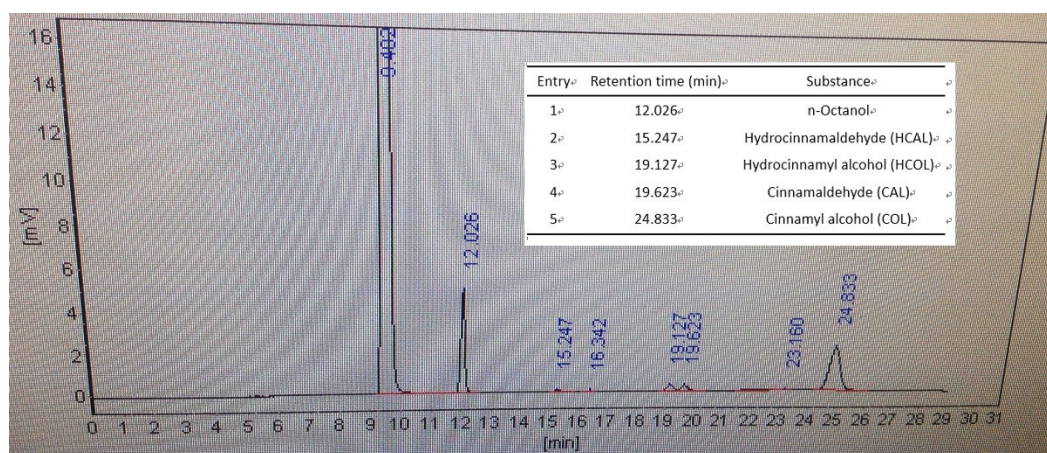

**Fig. S3** The GC spectrum of products over Pt/Fe<sub>3</sub>O<sub>4</sub>(100) catalyst for the hydrogenation of CAL.



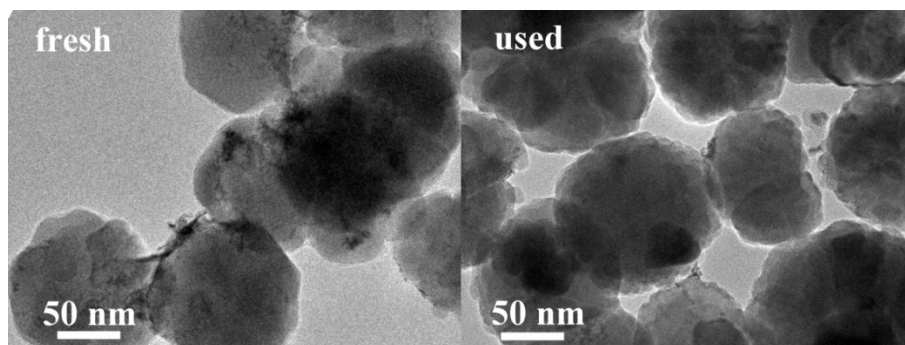

**Fig. S4** TEM images of fresh and used Pt/Fe<sub>3</sub>O<sub>4</sub>(100) catalyst.
